# Supplementary material for: Multifunctionality of Jasmonic Acid Accumulation during Aphid Infestation in Altering the Plant Physiological Traits That Suppress the Plant Defenses in Wheat Cultivar XN979
Source: MDPI journal article supplement (doi:10.3390/insects14070622), 2023-07-11
Supplement: s1 [file s1]

**Table S1.** Primer sequences used for quantification of gene expression by RT-qPCR.

| <b>Gene<br/>descriptedn</b> | <b>Forward primer sequence (5'-3')</b> | <b>Reverse primer sequence (5'-3')</b> | <b>Tm/°C</b> | <b>References:</b> |
|-----------------------------|----------------------------------------|----------------------------------------|--------------|--------------------|
| <i>TaGAPDH</i>              | AACTGTTTCATGCCATCACTGCCAC              | AGGACATACCAGTGAGCTTGCCAT               | 53           | [26]               |
| <i>TaPAL</i>                | GAGATGAGACCCAGAGAGAGTTGACA             | AAGGGAGCTGAGATTGCCATGG                 | 55           | [26]               |
| <i>TaPR-1</i>               | TTCATCATCTGCAGCTACAACC                 | CGGTACATATATACAGCCGGTCTAA              | 57           | [26]               |
| <i>TaTDC</i>                | GCTTTCGGATCAAGGCAAG                    | CGTGTGTGCAAGATAAGCC                    | 51           | [26]               |
| <i>TaAOS</i>                | TCTCATAGCAGCCGTCAATC                   | AAAACACGCACACACATACA                   | 60           | [18]               |
| <i>TaLOX</i>                | GGCCTTCATCCACACCATCACC                 | TCGCTGAACCGCTTGAACACCT                 | 60           | [18]               |
| <i>TaPR-4</i>               | ACACCGTCTTCACCAAGATCGACA               | AGCATGGATCAGTCTCAGTGCTCA               | 60           | [11]               |
| <i>TaNPR1</i>               | ACTTGGAACAGAGTTGCCTTT                  | GTACTTTCGCCCTAACTCAACTGT               | 60           | [11]               |
| <i>TaWRKY3</i>              | TGCGACTAAACTGATGCG                     | CTTTGCCATTACCGTCGTC                    | 60           | [26]               |
| <i>TaPDF1.2</i>             | AGCAACAAACACGACCTACTAGC                | CCTGTGTCCCGTAATAAAGTAGGA               | 60           | [11]               |
